# Supplementary material for: Wi-Fi/LoRa communication systems for fire and seismic-risk mitigation and health monitoring
Source: Frontiers journal article supplement (doi:10.3389/fdest.2025.1484647), 2025-02-07
Supplement: Data_Sheet_1.pdf [file Data_Sheet_1.pdf]

# SUPPORTING INFORMATION

## 1. Understanding the payload formatter

The most important aspects when monitoring data in The Cloud are the frequency acquisition rate and the reception of such values in the network. Due to limitations of the MKRWAN, the minimum period between measurements achieved is 110 ms that corresponds to a frequency of 9 Hz. This could be possible due to the creation of vector of 64 bytes that is the maximum capacity of each package sending The LoRa platform used (The Things of Stack) that includes in the Arduino function “analogRead” a delay of 110 ms in the code. An explanation of the procedure is the following (see Figure S1):

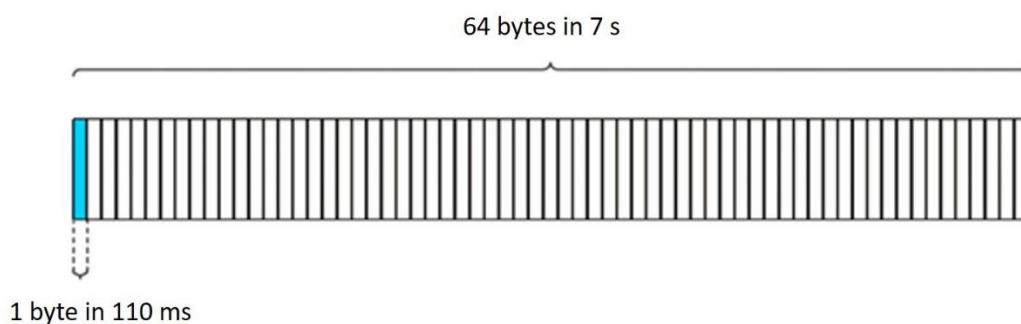

*Figure S1: Vector of 64 bytes sent from MKRWAN1300 to TTS*

Regarding RFM95, the maximum number of bytes of a package is 240 bytes. In addition, the minimum time achieved for the sending of packages for that size without any data loss between packages is if 2 s, with a frequency of data sending of 20 Hz (see Figure S2)

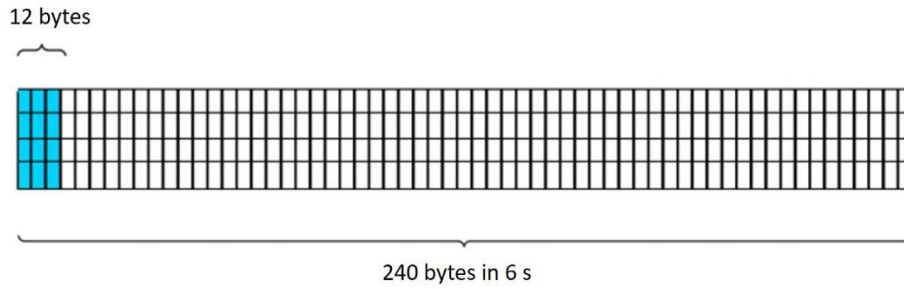

*Figure S2: Vector of 240 bytes sent from RFM95 to TTS*

In order to ensure continuity in the pulses, the differences from the initial and final timestamps of two continuous vectors will be approximately 170 ms, changing the range in  $\pm 20$  ms (see Figure S3).

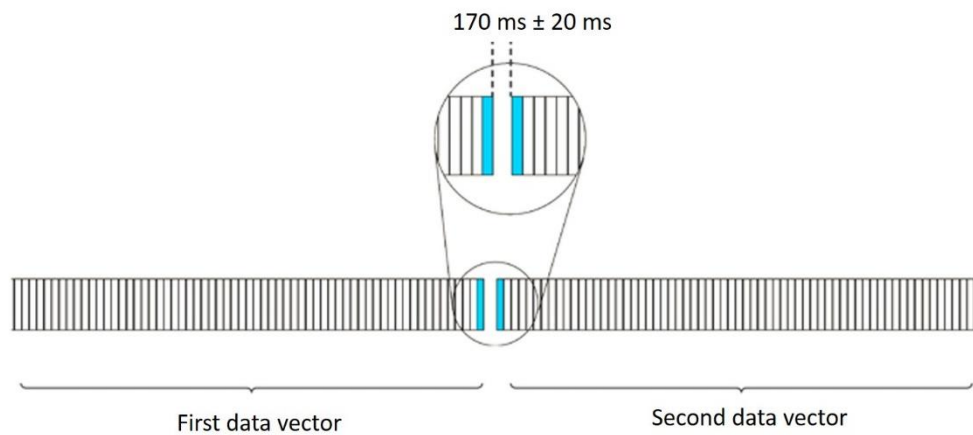

*Figure S3: Time lost between packages*

As an example of continuity between pulses, frequencies of 1.6 Hz, 2.5 Hz and 5 Hz are presented. Only for the case of 1.6 Hz, no pulses are lost.

## FIGURES AND TABLES

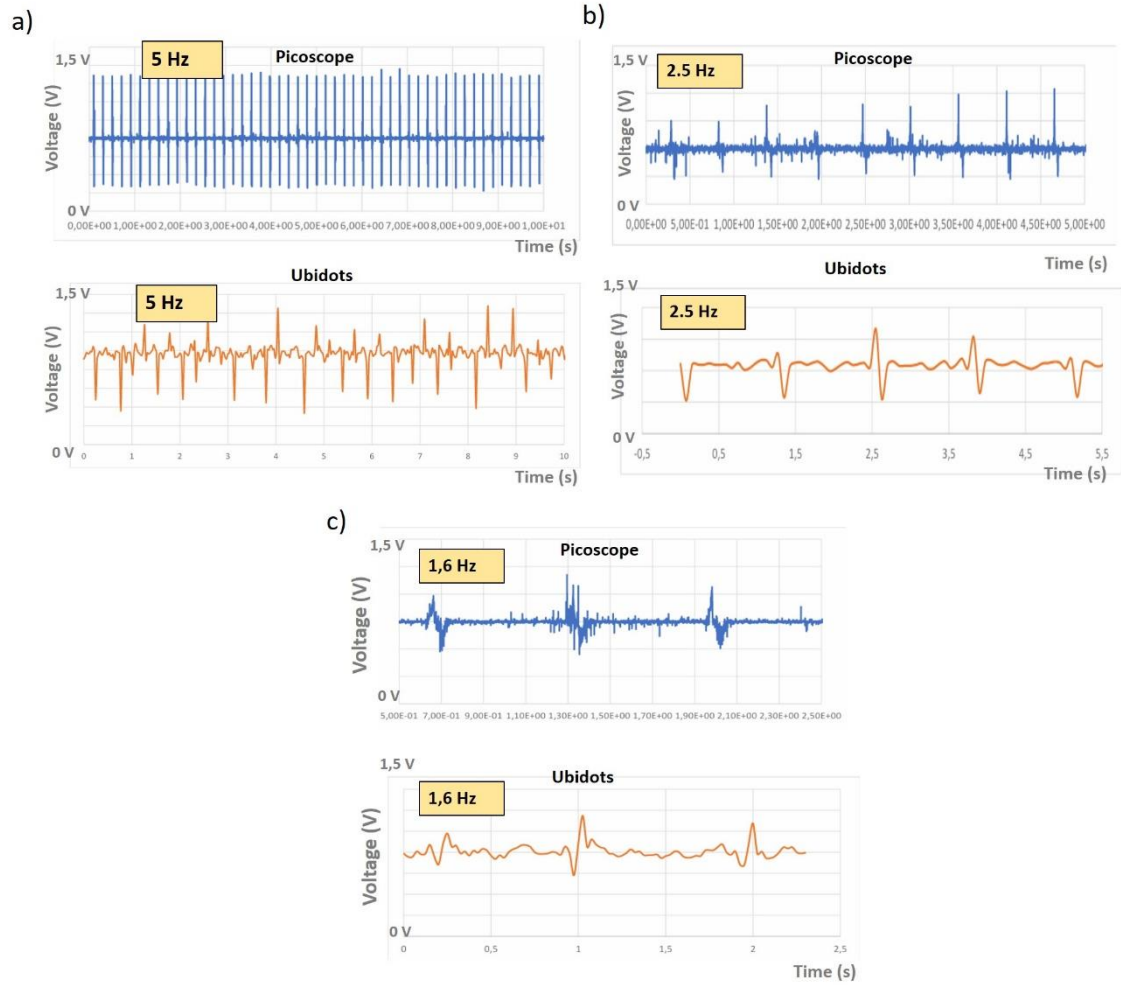

*Figure S4: a) 5 Hz, b) 2.5 Hz and c) 1.65 Hz signal monitored in a) the digital oscilloscope Picoscope and b) transmitted via LoRa to the TTN platform and monitored in UBIDOTS*

An example of the pulses detected with the 3D seismic sensor is shown in Figure S5 . Here, each of the ADS1115 of 16-bit voltage converters connected to three RFM95 chips generate voltage signals plotted online in Ubidots.

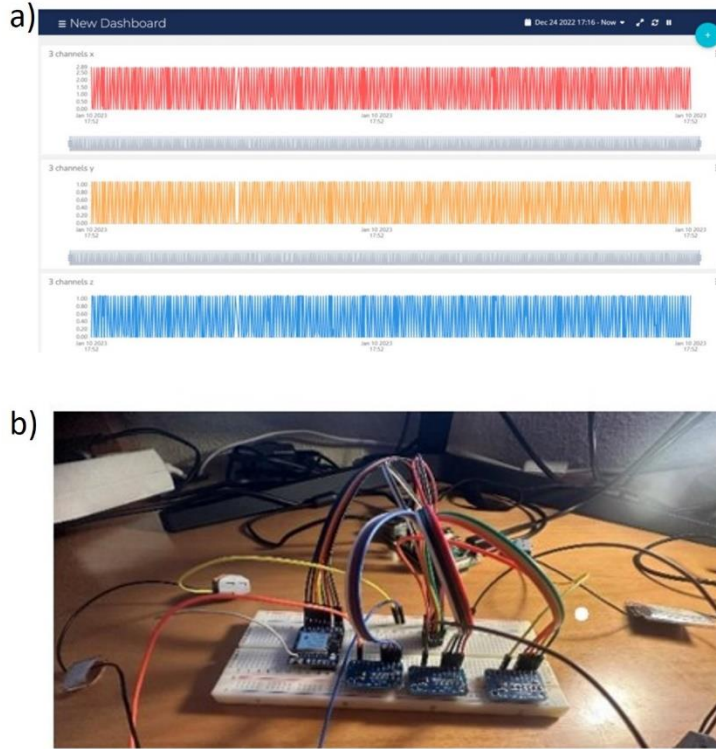

Figure S5: a) Ubidots interface online pulses b) Experimental set-up of the 3D seismic sensor DAQ.

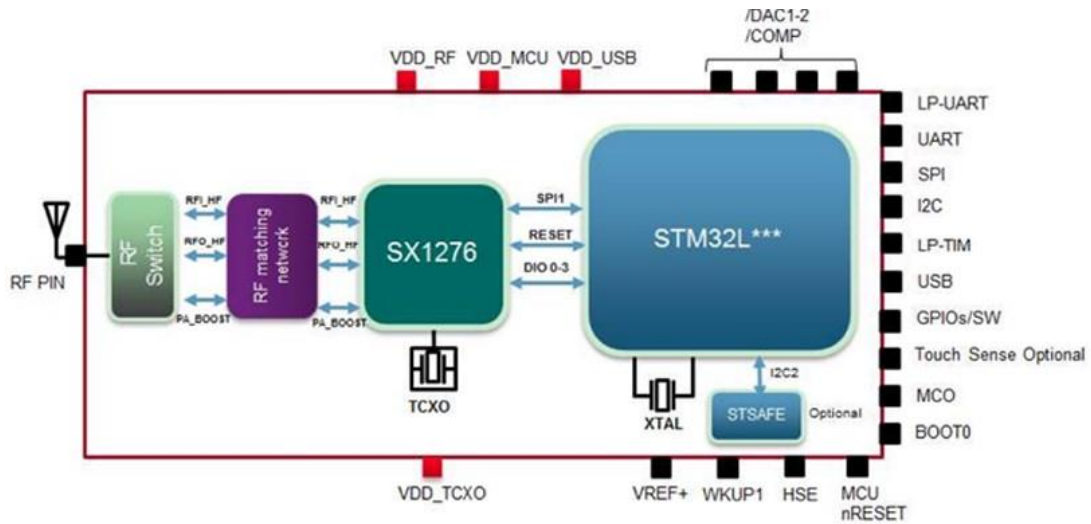

Figure S6: Pinout of the module CMWX1ZZABZ-091 [1]

| <b>DAQ<br/>(LoRa)</b>                               | <b>Max.<br/>Frequen<br/>cy of<br/>pulses<br/>measured<br/>(Hz)</b> | <b>Max.<br/>Number of<br/>bytes of<br/>each<br/>package</b>         | <b>Bitrate<br/>(bps)</b>                                                                           | <b>Max. Power<br/>consumption<br/>(sleeping/work<br/>ing)</b> | <b>LoRa<br/>Bandwid<br/>th (kHz)<br/>and pulse<br/>width<br/>(<math>\Delta V/t</math>)</b> | <b>Sample<br/>rate<br/>(kSamples/s)</b> |
|-----------------------------------------------------|--------------------------------------------------------------------|---------------------------------------------------------------------|----------------------------------------------------------------------------------------------------|---------------------------------------------------------------|--------------------------------------------------------------------------------------------|-----------------------------------------|
| MKRWA<br>N<br>1300                                  | 9 (120 ms<br>between<br>packages)                                  | 64                                                                  | 73                                                                                                 | 70 $\mu$ W/70 mW                                              | 125 kHz<br>/0.3V/0.1<br>s=3V/s                                                             | 0.01                                    |
| RFM95                                               | 20                                                                 | 242                                                                 | 320                                                                                                | 70 $\mu$ W /30 mW<br>(Tx) and 100<br>mW (Rx)                  | 125 kHz/<br>0.3V/0.1s<br>=3V/s                                                             | 0.01                                    |
| RAK245<br>0                                         | 1<br>between<br>packages                                           | SF1=>51<br>SF11=>51<br>SF10=>51<br>SF9=>115<br>SF8=>242<br>SF7=>242 | SF12=>25<br>2<br>SF11=>44<br>0<br>SF10=>98<br>0<br>SF9=>176<br>0<br>SF8=>312<br>5<br>SF7=>547<br>0 | 10 W                                                          | 125 kHz/-                                                                                  | 0.05                                    |
| 1<br>RFM95+<br>1<br>ADS111<br>5<br>(1 axis)<br>(1D) | 1.7 (exp)                                                          | 242                                                                 | 16                                                                                                 | 3 $\mu$ W /< 400<br>mW                                        | 125 kHz<br>0.3V/0.1s<br>=3V/s                                                              | 0.04                                    |
| 1 RFM95<br>+ 2<br>ADS111<br>5<br>(2 axis)<br>(2D)   | 1.7/2=0.8<br>5(exp)                                                | 242                                                                 | 16                                                                                                 | 3 $\mu$ W /< 400<br>mW                                        | 125 kHz<br>0.3V/0.1s<br>=3V/s                                                              | 0.02                                    |
| 1<br>RFM95+<br>3<br>ADS111<br>5 (3D)<br>(3 axis)    | 1.7/3=0.6<br>5(exp)                                                | 242                                                                 | 16                                                                                                 | 3 $\mu$ W /< 400<br>mW                                        | 125 kHz<br>0.3V/0.1s<br>=3V/s                                                              | 0.01                                    |

*Table S1: Comparison chart of the remote communication devices used with the*

*MKRWAN1300 and the RFM45 with the ADS1115 sensors.*

| Characteristics          | Value | Unit        |
|--------------------------|-------|-------------|
| Supply                   | 3.3-5 | V           |
| Maximum frequency        | 930   | MHz         |
| Flash memory             | 192   | Kbytes      |
| EEPROM memory            | 20    | Kbytes      |
| Standby Mode Consume     | 1.95  | $\mu$ A/MHz |
| Stop Mode Consume        | 5.5   | $\mu$ A/MHz |
| Transmitter Mode Consume | 34    | mA/MHz      |
| I2C Ports                | 3     | -           |
| USART Ports              | 4     | -           |
| SPI Ports                | 2     | -           |

*Table S2: Electronic characteristics of the STM32L072Z-LRWAN1 kit.*

| Characteristics          | Magnitude | Units   |
|--------------------------|-----------|---------|
| Supply                   | 3.3-5     | V       |
| Dimensions               | 14x17     | mm      |
| Resolution (max)         | 16        | bits    |
| Standby mode consume     | 0.7       | $\mu$ A |
| Measurement mode consume | 600       | $\mu$ A |

*Table S3: Electronic characteristics of the MAX30100 sensor*

| Characteristics          | Magnitude | Units   |
|--------------------------|-----------|---------|
| Supply                   | 3.3-5     | V       |
| Measurement mode consume | 67        | mA      |
| Standby mode consume     | 22        | $\mu$ A |
| Refresh rate             | 5         | Hz      |
| Max. height              | 50        | km      |
| Accuracy                 | 2.5       | m       |
| Ports                    | UART      | -       |

*Table S4: Electronic characteristics of the NEO-6M-0-001 U-Blox with UART communication interface.*

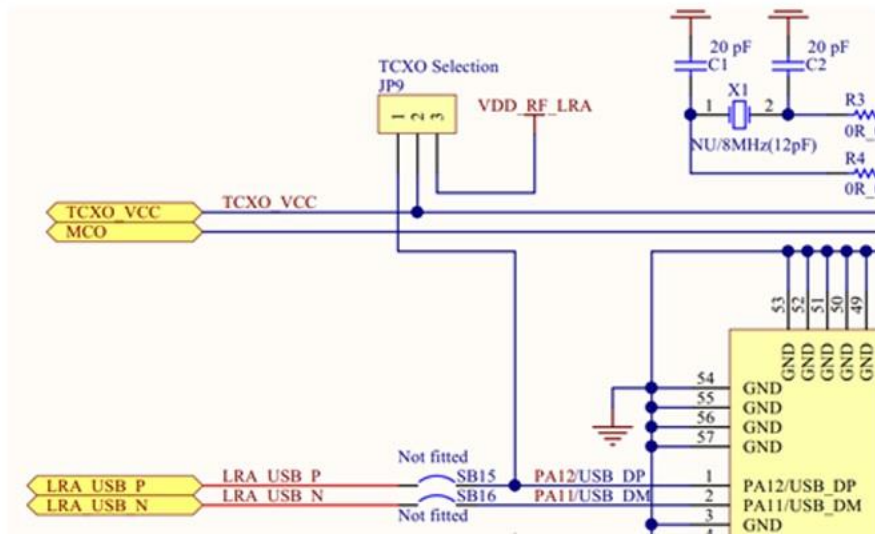

Figure S7: Connection map of the STM32L072Z-LRWAN1 Kit.

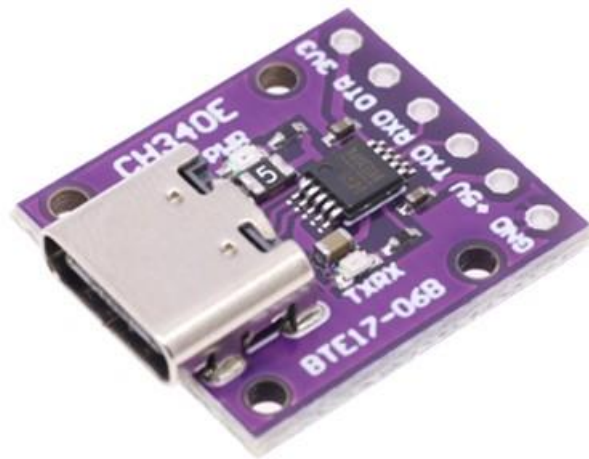

Figure S8: USB-TTL CH340E module.

| Characteristics          | Magnitude  | Units |
|--------------------------|------------|-------|
| Supply                   | 3.3-5      | V     |
| Measurement mode consume | 20         | mA    |
| Standby mode consume     | 100        | μA    |
| Bauds rate supported     | 50-2000000 | Bauds |
| Max. frequency           | 12         | MHz   |
| Ports                    | UART       | -     |

Table S5: Electronic characteristics of the CH340E module.

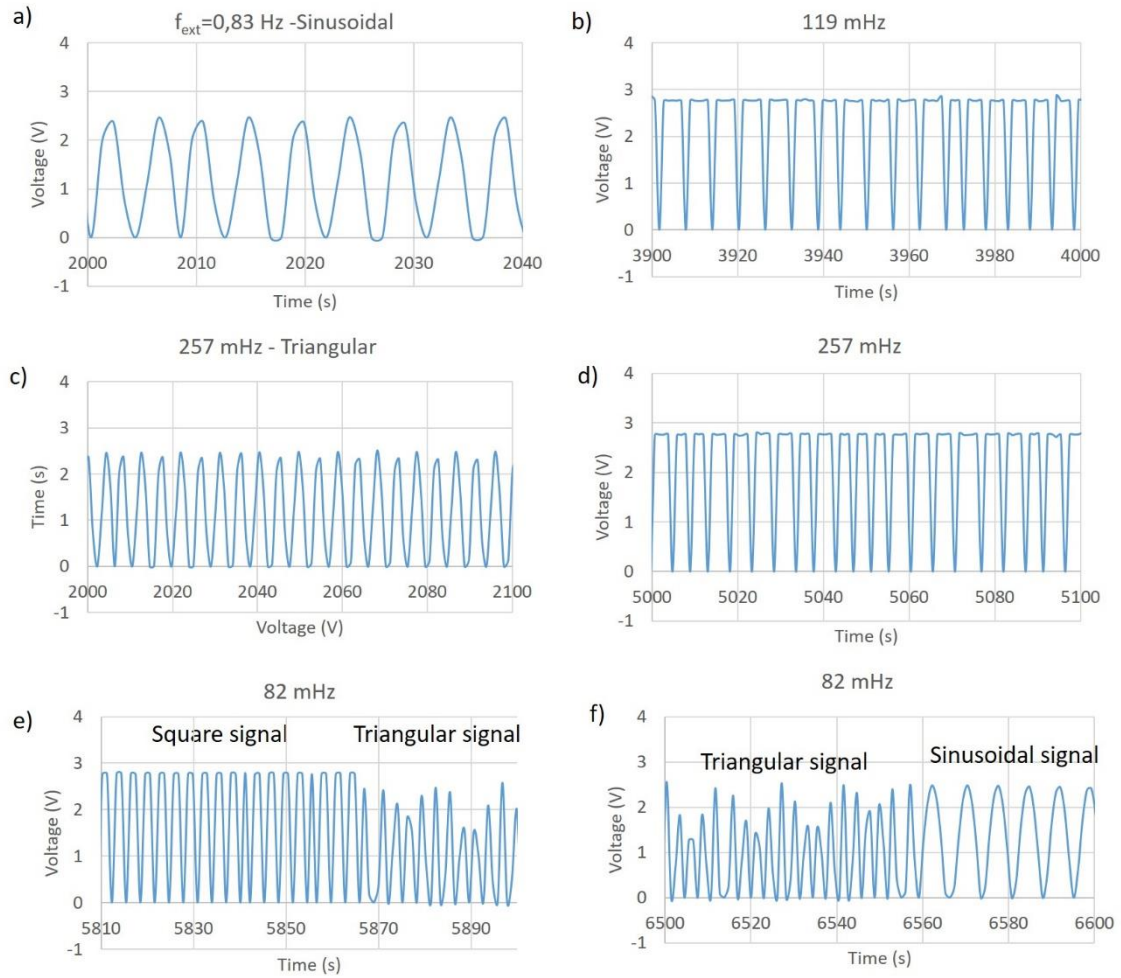

*Figure S9: Different frequency waveforms in the cloud. a) Sinusoidal waveform of 830 mHz. b) Square signal of 119 mHz. c) Triangular waveform of 257 mHz. d) Squared signal of 257 mHz. e) Change of waveform from square to triangular. f) Change of waveform from triangular to sinusoidal.*

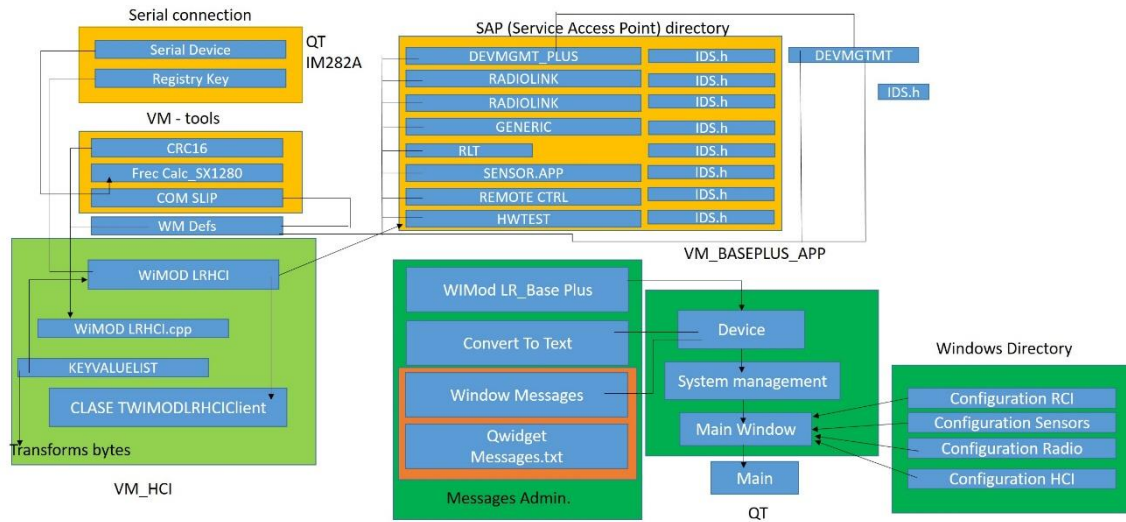

*Figure S10: Different classes from the Wi-Mod libraries and IM282A needed to create an operative interface for sensor communication between modules.*
